# Supplementary material for: Enzymatically degradable, starch-based layer-by-layer films: application to cytocompatible single-cell nanoencapsulation
Source: Royal Society of Chemistry journal article supplement (doi:10.1039/d0sm00876a), 2020-01-01
Supplement: d0sm00876a1.pdf [file d0sm00876a1.pdf]

## Supporting Information

### Enzymatically Degradable, Starch-Based Layer-by-Layer Films: Application to Cytocompatible Single-Cell Nanoencapsulation

Hee Chul Moon,<sup>a</sup> Sol Han,<sup>a</sup> João Borges,<sup>b</sup> Tamagno Pesqueira,<sup>b</sup> Hyunwoo Choi,<sup>a</sup> Sang Yeong

Han,<sup>a</sup> Hyeoncheol Cho,<sup>a</sup> Ji Hun Park,<sup>c</sup> João F. Mano,<sup>\*b</sup> and Insung S. Choi<sup>\*a</sup>

<sup>a</sup>Center for Cell-Encapsulation Research, Department of Chemistry, KAIST, Daejeon 34141, Korea. E-mail: ischoi@kaist.ac.kr

<sup>b</sup>Department of Chemistry, CICECO-Aveiro Institute of Materials, University of Aveiro, Campus Universitário de Santiago, 3810-193 Aveiro, Portugal. E-mail: jmano@ua.pt

<sup>c</sup>Department of Science Education, Ewha Womans University, Seoul 03760, Korea.

### CONTENTS

- Fig S1. (a) Synthesis scheme for the synthesis of *c*-ST from ST. (b) <sup>1</sup>H-NMR spectrum of *c*-ST with peak assignments. (c) Elemental-analysis data of *c*-ST.
- Fig S2. Digital photographs of the water droplets on bare gold, and [*c*-ST]<sub>5</sub>[ALG]<sub>4</sub> and [*c*-ST]<sub>5</sub>[ALG]<sub>5</sub> multilayer films.
- Fig S3. Graphs of ellipsometric-thickness vs. reaction time: (a) hyaluronidase and α-glucosidase (concentration: 500 μg mL<sup>-1</sup>) and (b) various pH values.
- Fig S4. AFM images of the [*c*-ST/ALG]<sub>5</sub> multilayer films after treatment with α-amylase (500 μg mL<sup>-1</sup>).
- Fig S5. FT-IR spectrum of the [*c*-ST/ALG]<sub>5</sub> multilayer films after 1 h of treatment with α-amylase (500 μg mL<sup>-1</sup>).

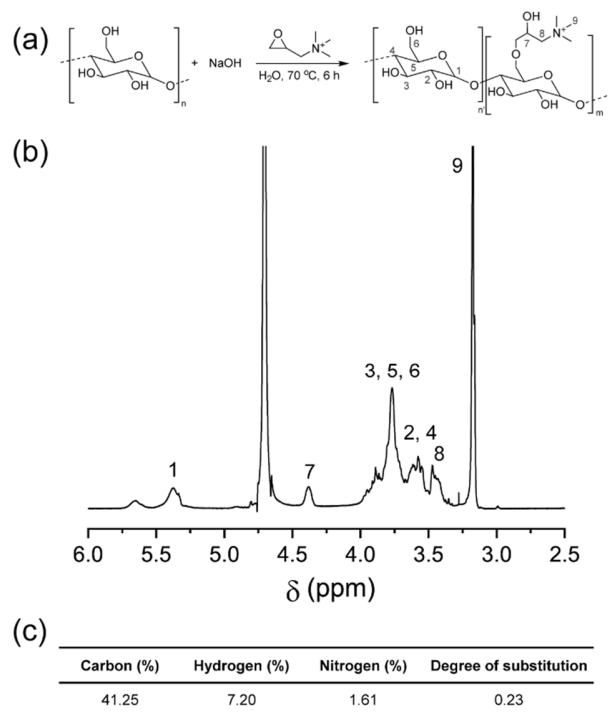

Fig S1. (a) Synthesis scheme for the synthesis of *c*-ST from ST. (b)  $^1\text{H}$ -NMR spectrum of *c*-ST with peak assignments. (c) Elemental-analysis data of *c*-ST.

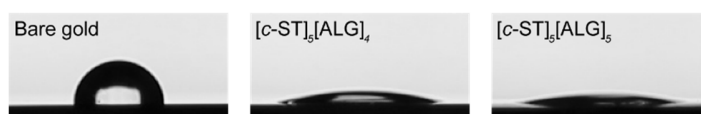

Fig S2. Digital photographs of the water droplets on bare gold, and  $[c\text{-ST}]_5[\text{ALG}]_4$  and  $[c\text{-ST}]_5[\text{ALG}]_5$  multilayer films.

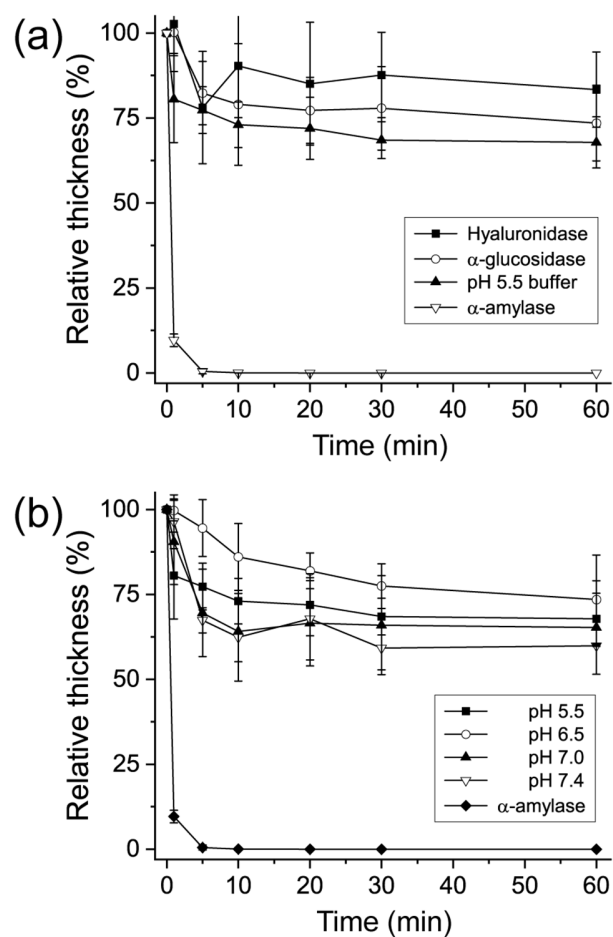

Fig S3. Graphs of ellipsometric-thickness vs. reaction time: (a) various enzymes (concentration:  $500 \mu\text{g mL}^{-1}$ ) and (b) various pH values.

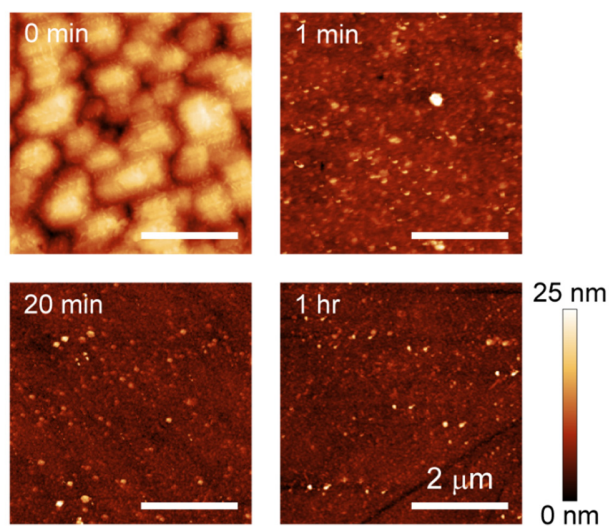

Fig S4. AFM images of the  $[c\text{-ST/ALG}]_5$  multilayer films after treatment with  $\alpha$ -amylase ( $500 \mu\text{g mL}^{-1}$ ).

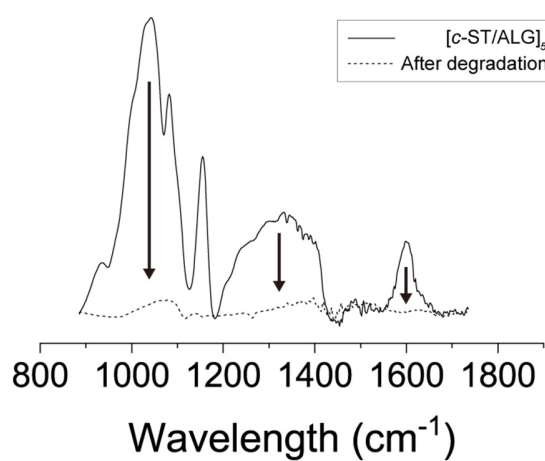

Fig S5. FT-IR spectrum of the  $[c\text{-ST/ALG}]_5$  multilayer films after 1 h of treatment with  $\alpha$ -amylase ( $500 \mu\text{g mL}^{-1}$ ).
